# Supplementary material
Source: MDPI journal article supplement (https://www.mdpi.com/2073-445X/8/12/179)
Supplement: s1 [file s1]

# Supplementary Information

## Potentials, limitations, co-benefits and trade-offs of biochar applications to soils for climate change mitigation

*Alexandre Tisserant<sup>1,\*</sup> and Francesco Cherubini<sup>1</sup>*

*\*) Address correspondence to:*

Alexandre Tisserant  
NTNU - Industrial Ecology Programme  
Høgskoleringen 5  
NO-7034 TRONDHEIM  
[alexandre.tisserant@ntnu.no](mailto:alexandre.tisserant@ntnu.no)

*1) Industrial Ecology Programme, Department of energy and process engineering, Norwegian University of Science and Technology (NTNU), Trondheim, Norway*

*Table S1: Main controlling factors on the effect of biochar on agricultural yield.*

| Controlling factors                                          |                  | Observations                                                                                                                                                                                                                                                                                                                                                            | Ref                                               |
|--------------------------------------------------------------|------------------|-------------------------------------------------------------------------------------------------------------------------------------------------------------------------------------------------------------------------------------------------------------------------------------------------------------------------------------------------------------------------|---------------------------------------------------|
| Biochar                                                      | Feedstock        | Sludge and manure biochars have the highest positive crop yield response, followed by herbaceous and last by wood feedstock. In temperate region, all types of feedstock lead to no significant positive effect on yield.<br><br>Tropical soils:<br>Sludge and manure biochars improve yield on average by 70%. Wood and herbaceous biochars only lead to 20% increase. | (Jeffery et al. 2017; Biederman and Harpole 2013) |
|                                                              | CEC              | Higher biochar CEC lead to higher increase in yield.                                                                                                                                                                                                                                                                                                                    | (Jeffery et al. 2017)                             |
|                                                              | Pyrolysis        | There is no clear effect of pyrolysis temperature on yield response (beside for >650°C that significantly has negative effect on yield). However fast pyrolysis and hydrothermal carbonization lead to significant negative crop yield effect.                                                                                                                          | (Jeffery et al. 2017)                             |
|                                                              | Ash content      | Ash content in biochar higher than 10% reduces yield increase from 30% to less than 10%.                                                                                                                                                                                                                                                                                | (Jeffery et al. 2017)                             |
|                                                              | C/N ratio        | Biochar's C/N ratio above 100 (biochars poor in N) lead to overall negative yield response                                                                                                                                                                                                                                                                              | (Jeffery et al. 2017)                             |
| Soil                                                         | pH               | Tropics:<br>Yield response to biochar application increases as soils are more and more acidic.<br><br>Temperate:<br>Significant negative yield response (down to -30%) are observed for neutral and alkaline soils.                                                                                                                                                     | (Jeffery et al. 2017, Wang et al. 2019)           |
| Management                                                   | Application rate | Tropics:<br>Yield response seem to cross a threshold at application rate between 50-150 t biochar per ha.<br><br>Temperate:<br>Application rate should be kept between 10-50 t biochar per ha, particularly less than 50 t biochar per ha as above that threshold significantly negative yield response is significant.                                                 | (Jeffery et al. 2017)                             |
|                                                              | Fertilizer       | Co-application of fertilizer with biochar can increase yield response.                                                                                                                                                                                                                                                                                                  | (Jeffery et al. 2017)                             |
| CEC: cation exchange capacity; C/N: carbon to nitrogen ratio |                  |                                                                                                                                                                                                                                                                                                                                                                         |                                                   |

*Table S2: Main controlling factors on the effect of biochar on soil and exposition to toxic compounds.*

| Controlling factors                                                 |                  | Observations                                                                                                                                                                                                                                                                                                                                                                                                                                                                                                                                                                                                                                                                                          | Ref                                                                                                                             |
|---------------------------------------------------------------------|------------------|-------------------------------------------------------------------------------------------------------------------------------------------------------------------------------------------------------------------------------------------------------------------------------------------------------------------------------------------------------------------------------------------------------------------------------------------------------------------------------------------------------------------------------------------------------------------------------------------------------------------------------------------------------------------------------------------------------|---------------------------------------------------------------------------------------------------------------------------------|
| Biochar                                                             | Feedstock        | Biochar feedstock is the main determinant for heavy metal concentration in biochar; out of 14 heavy metals, manures-biochar had higher concentrations for 11 of them.<br>PAHs concentrations are higher in plant-based biochar, due to higher carbon content than in manures.<br>No clear pattern between feedstocks and VOCs production have been observed.<br>Feedstock rich in chlorine, such as food waste, can lead to production of chlorinated compounds such as dioxins.                                                                                                                                                                                                                      | (Qiu et al. 2015; Dutta et al. 2017; Hale et al. 2012)                                                                          |
|                                                                     | Temperature      | Production:<br>Temperature is the main control for PAHs concentration on biochar, biochars produced at temperature between 350 and 550°C show higher PAHs concentration than those produced at both lower or higher temperature.<br>Dioxins production is maximum at low temperature (200-400°C).<br>Amount of VOCs adsorbed on biochar surface decreases with increasing temperature, and is really reduced past 500°C.<br><br>Once in soils:<br>Higher temperature biochars have higher sorption capacity toward pesticide and other organic compounds, mostly due to higher porosity.<br>Liming effect of higher temperature biochars may also be important for reducing toxicity of heavy metals. | (Hale et al. 2012; Dutta et al. 2017; Qiu et al. 2015; Ghidotti, Fabbri, and Hornung 2017; Yavari, Malakahmad, and Sapari 2015) |
|                                                                     | Reaction time    | Reaction time is an important control for the production of toxic compounds during pyrolysis. Short reaction time (e.g. fast pyrolysis) produces biochars that contain higher concentration PAHs, VOCs, and dioxins at their surface.                                                                                                                                                                                                                                                                                                                                                                                                                                                                 | (Dutta et al. 2017; Hale et al. 2012)                                                                                           |
| Soil                                                                | Soil carbon      | Soil carbon is an important control for the sorbing capacity of soils. Soils with high carbon content are likely to be able to sorb pollutants desorbed by biochars.                                                                                                                                                                                                                                                                                                                                                                                                                                                                                                                                  | (Dutta et al. 2017)                                                                                                             |
|                                                                     | Pollution status | Prior level of contaminant in soils may already saturate its sorbing capacity, allowing higher desorption of biochars' contaminant.                                                                                                                                                                                                                                                                                                                                                                                                                                                                                                                                                                   | (Dutta et al. 2017)                                                                                                             |
| PAH: Polycyclic aromatic hydrocarbons; VOC: volatile organic carbon |                  |                                                                                                                                                                                                                                                                                                                                                                                                                                                                                                                                                                                                                                                                                                       |                                                                                                                                 |

Table S3: CDR requirements for different temperature pathways. Taken from Huppmann et al. (2018)

Carbon sequestration (GtCO<sub>2</sub>/year)

| Deploy.<br>horizon | 2030             |            |                       |                        |             |             | 2050         |            |                       |                        |             |             | 2100         |            |                       |                        |             |             |
|--------------------|------------------|------------|-----------------------|------------------------|-------------|-------------|--------------|------------|-----------------------|------------------------|-------------|-------------|--------------|------------|-----------------------|------------------------|-------------|-------------|
|                    | Temp.<br>pathway | Below 1.5C | 1.5C low<br>overshoot | 1.5C high<br>overshoot | Lower<br>2C | Above<br>2C | Higher<br>2C | Below 1.5C | 1.5C low<br>overshoot | 1.5C high<br>overshoot | Lower<br>2C | Above<br>2C | Higher<br>2C | Below 1.5C | 1.5C low<br>overshoot | 1.5C high<br>overshoot | Lower<br>2C | Above<br>2C |
| count              | 9                | 43         | 37                    | 67                     | 167         | 57          | 9            | 44         | 37                    | 74                     | 175         | 58          | 9            | 44         | 37                    | 74                     | 180         |             |
| mean               | 2.15             | 2.66       | 2.03                  | 1.45                   | 0.94        | 1.21        | 7.42         | 11.99      | 14.92                 | 8.89                   | 3.68        | 9.24        | 11.24        | 18.08      | 21.84                 | 15.14                  | 11.69       |             |
| std                | 2.40             | 1.85       | 1.55                  | 1.29                   | 1.22        | 1.51        | 5.40         | 5.29       | 4.75                  | 5.68                   | 4.12        | 5.85        | 7.67         | 11.02      | 9.88                  | 10.91                  | 11.78       |             |
| min                | 0.13             | 0.12       | 0.07                  | 0.00                   | 0.00        | 0.00        | 0.31         | 0.31       | 5.24                  | 0.00                   | 0.00        | 0.00        | 0.07         | 0.07       | 2.74                  | 0.00                   | 0.00        |             |
| 5%                 | 0.13             | 0.38       | 0.08                  | 0.00                   | 0.00        | 0.00        | 1.08         | 1.69       | 8.27                  | 0.00                   | 0.00        | 0.00        | 0.46         | 1.77       | 9.53                  | 0.00                   | 0.00        |             |
| 10%                | 0.13             | 0.39       | 0.49                  | 0.00                   | 0.00        | 0.02        | 1.86         | 5.12       | 9.34                  | 0.00                   | 0.00        | 1.66        | 0.85         | 6.08       | 13.45                 | 0.00                   | 0.00        |             |
| 15%                | 0.19             | 0.42       | 0.58                  | 0.00                   | 0.00        | 0.09        | 2.74         | 6.40       | 9.77                  | 0.56                   | 0.00        | 3.85        | 1.99         | 8.87       | 14.52                 | 0.43                   | 0.00        |             |
| 25%                | 0.40             | 0.80       | 0.80                  | 0.36                   | 0.00        | 0.20        | 4.74         | 7.61       | 12.40                 | 6.06                   | 0.01        | 5.50        | 5.76         | 11.95      | 15.96                 | 8.13                   | 0.23        |             |
| 35%                | 0.41             | 1.49       | 1.12                  | 0.49                   | 0.07        | 0.46        | 5.41         | 10.34      | 12.83                 | 7.30                   | 1.04        | 7.05        | 10.75        | 14.77      | 16.29                 | 11.26                  | 3.46        |             |
| 50%                | 0.42             | 2.66       | 1.65                  | 1.09                   | 0.36        | 0.91        | 6.25         | 13.55      | 15.09                 | 9.58                   | 2.48        | 9.49        | 12.96        | 17.05      | 22.04                 | 14.91                  | 8.17        |             |
| 75%                | 3.26             | 4.14       | 2.93                  | 2.49                   | 1.46        | 1.54        | 9.13         | 16.02      | 17.46                 | 12.08                  | 5.71        | 11.45       | 14.88        | 21.68      | 25.52                 | 21.31                  | 18.40       |             |
| 95%                | 5.83             | 5.39       | 4.38                  | 3.75                   | 3.49        | 3.21        | 15.99        | 18.07      | 22.41                 | 18.64                  | 11.91       | 20.13       | 21.22        | 30.17      | 43.57                 | 31.10                  | 35.94       |             |
| max                | 5.93             | 6.30       | 7.63                  | 4.56                   | 5.77        | 9.78        | 17.34        | 20.21      | 28.32                 | 24.63                  | 22.90       | 29.96       | 23.13        | 62.87      | 45.43                 | 45.65                  | 48.73       |             |

Table S4: Total cumulative CDR requirements for different temperature pathways. Taken from Huppmann et al. (2018)

| Carbon sequestration (GtCO2) |            |                    |                     |          |          |           |  |
|------------------------------|------------|--------------------|---------------------|----------|----------|-----------|--|
| Temperature pathway          | Below 1.5C | 1.5C low overshoot | 1.5C high overshoot | Lower 2C | Above 2C | Higher 2C |  |
| count                        | 7          | 43                 | 35                  | 63       | 158      | 51        |  |
| mean                         | 611.80     | 828.28             | 1,042.61            | 855.82   | 484.52   | 983.39    |  |
| std                          | 196.00     | 363.49             | 312.34              | 351.99   | 477.39   | 390.22    |  |
| min                          | 268.06     | 0.00               | 480.78              | 112.88   | 0.00     | 247.13    |  |
| 5%                           | 335.11     | 126.90             | 632.32              | 410.27   | 0.00     | 503.11    |  |
| 15%                          | 469.21     | 427.87             | 809.53              | 517.67   | 0.00     | 669.45    |  |
| 25%                          | 525.16     | 558.79             | 863.92              | 657.12   | 3.70     | 744.97    |  |
| 50%                          | 619.62     | 903.80             | 919.60              | 827.42   | 413.91   | 890.97    |  |
| 75%                          | 753.22     | 1,033.10           | 1,207.02            | 1,002.16 | 819.15   | 1,174.84  |  |
| 95%                          | 825.71     | 1,399.39           | 1,592.01            | 1,482.78 | 1,323.81 | 1,768.92  |  |
| max                          | 838.19     | 1,493.92           | 1,858.40            | 1,978.85 | 2,034.77 | 2190.55   |  |

Table S5: Key biochar properties and their controlling factors under slow pyrolysis.

| Property                  | Controlling factor | Observations                                                                                                                                                                                                                                                                                                                                                                                                                                | Ref                                                             |
|---------------------------|--------------------|---------------------------------------------------------------------------------------------------------------------------------------------------------------------------------------------------------------------------------------------------------------------------------------------------------------------------------------------------------------------------------------------------------------------------------------------|-----------------------------------------------------------------|
| Yield and carbon content  | Feedstock          | For similar pyrolysis temperature, ligno-cellulosic materials (e.g. woody and herbaceous feedstocks) have higher yield and carbon content, than manures or sludge.                                                                                                                                                                                                                                                                          | (Li et al. 2019)                                                |
|                           | Temperature        | Yield decreases with increasing temperature and reaches a plateau at about 600°C for wood/herbaceous feedstock, and 400°C for manures/biosolids.<br>Carbon content in biochar increases linearly with pyrolysis temperatures.                                                                                                                                                                                                               | (Li et al. 2019)                                                |
|                           | Additives          | Potassium (K) increases the amount of carbon retention in biochar by 45%.                                                                                                                                                                                                                                                                                                                                                                   | (Mašek et al. 2019)                                             |
| Porosity and surface area | Feedstock          | Macroporosity retains the cell structure of feedstock. Woody feedstock have much higher surface area than other feedstocks: Woody > herbaceous > manures > sludge (surface area is divided by a factor two between each categories).                                                                                                                                                                                                        | (Li et al. 2019; Wildman and Derbyshire 1991; Gray et al. 2014) |
|                           | Temperature        | Higher pyrolysis temperature increases biochar's microporosity.<br>Surface area increases with pyrolysis temperature.                                                                                                                                                                                                                                                                                                                       | (Li et al. 2019)                                                |
| Ash                       | Feedstock          | Ash content increases, as sludge/digestate > manures > herbaceous > wood.<br>Ash content also changes with feedstock. Herbaceous-derived biochars have higher N and P content than wood-derived biochar, but usually less base cation ( $\text{Ca}^{2+}$ , $\text{Mg}^{2+}$ , $\text{K}^+$ ) (especially compared to softwood). Hardwood-biochar have the most Sulfur.<br>Manures-biochar are both the richest in N and P and base cations. | (Li et al. 2019; Ippolito et al. 2015)                          |
|                           | Temperature        | Ash content increases with pyrolysis temperatures.                                                                                                                                                                                                                                                                                                                                                                                          | (Li et al. 2019)                                                |
| H/C <sub>org</sub>        | Feedstock          | Wood and herbaceous feedstock have similar H/C <sub>org</sub> ratios at a given temperature. Manures and sludge have much higher ratios.<br>Indicate a higher level of aromatic condensation in biochar produced from lignocellulosic biomass.                                                                                                                                                                                              | (Li et al. 2019; Xiao, Chen, and Chen 2016)                     |
|                           | Temperature        | H/C <sub>org</sub> decreases with increasing pyrolysis temperature.<br>Indicate a higher level of aromatic condensation of biochar at higher temperature.                                                                                                                                                                                                                                                                                   | (Li et al. 2019; Weber and Quicker 2018)                        |
| O/C <sub>org</sub>        | Feedstock          | Wood and herbaceous feedstock have similar O/C <sub>org</sub> ratios at a given temperature. Manures have much higher ratios.                                                                                                                                                                                                                                                                                                               | (Li et al. 2019)                                                |
|                           | Temperature        | O/C <sub>org</sub> decreases with increasing pyrolysis temperature                                                                                                                                                                                                                                                                                                                                                                          | (Li et al. 2019)                                                |
| C/N                       | Feedstock          | Wood has much higher C/N ratio (much poorer in N compared to C), about twice as high as for herbaceous feedstock. Manures and sludge are much richer in N compared to C, by a factor 10 compared to wood.                                                                                                                                                                                                                                   | (Li et al. 2019)                                                |
|                           | Temperature        | C/N increases with increasing pyrolysis temperature, biochar becomes poorer in N compared to C.                                                                                                                                                                                                                                                                                                                                             | (Li et al. 2019)                                                |
| CEC (negative charges on  | Feedstock          | Wood and manures derived biochars have lower CEC than herbaceous and sludge.                                                                                                                                                                                                                                                                                                                                                                | (Li et al. 2019)                                                |

|                                   |               |                                                                                                                                                                                                                                                                                                                                                                                                                                                                                                                                                                    |                                                              |
|-----------------------------------|---------------|--------------------------------------------------------------------------------------------------------------------------------------------------------------------------------------------------------------------------------------------------------------------------------------------------------------------------------------------------------------------------------------------------------------------------------------------------------------------------------------------------------------------------------------------------------------------|--------------------------------------------------------------|
| biochar)                          | Temperature   | CEC decreases with pyrolysis temperature. Due to lower O/C <sub>org</sub> and lower H/C <sub>org</sub> .                                                                                                                                                                                                                                                                                                                                                                                                                                                           | (Li et al. 2019)                                             |
|                                   | pH conditions | Different oxygen functional groups have different pKa, and are deprotonated under different pH conditions. CEC increases with increasing pH, as at higher pH, acids and alcohol of higher pKa are successively deprotonated.                                                                                                                                                                                                                                                                                                                                       | (Banik et al. 2018; Chen et al. 2015; Szymański et al. 2002) |
|                                   | Aging         | During aging in soils, biochar surface is oxidized, increasing O/C <sub>org</sub> ratios and its CEC.                                                                                                                                                                                                                                                                                                                                                                                                                                                              | (Mia, Dijkstra, and Singh 2017)                              |
| AEC (positive charges on biochar) | Feedstock     | Wood biochar have higher AEC than herbaceous feedstock.                                                                                                                                                                                                                                                                                                                                                                                                                                                                                                            | (Lawrinenko and Laird 2015; Banik et al. 2018)               |
|                                   | Temperature   | Pyrolysis temperature increases AEC.                                                                                                                                                                                                                                                                                                                                                                                                                                                                                                                               | (Lawrinenko and Laird 2015; Banik et al. 2018)               |
|                                   | pH conditions | AEC can be significant in acidic pH but not at neutral or alkaline pH, and quickly decreases with increasing pH. AEC comes mostly from pH dependant sites that are protonated in acidic conditions.                                                                                                                                                                                                                                                                                                                                                                | (Lawrinenko and Laird 2015)                                  |
|                                   | Aging         | Very little AEC is structurally stable, and will disappear quickly under soil aging.                                                                                                                                                                                                                                                                                                                                                                                                                                                                               | (Lawrinenko et al. 2016)                                     |
|                                   | Additives     | Pre-treatment of feedstock with aluminum and iron can increase AEC at higher pH (alkaline conditions).                                                                                                                                                                                                                                                                                                                                                                                                                                                             | (Lawrinenko et al. 2017; Banik et al. 2018)                  |
| Surface charge                    | Temperature   | The pH at which global charge of surface biochar is null increases with increasing pyrolysis temperature.                                                                                                                                                                                                                                                                                                                                                                                                                                                          | (Banik et al. 2018)                                          |
| pH and alkalinity                 | Feedstock     | Wood biochar are more acidic (range of pH 4-8) than herbaceous (range of pH 6-12). Manures are the most alkaline (range of pH 8-10). Wood biochar have little alkalinity, while herbaceous and manures have higher level of alkalinity. Carbonates in ashes are a major source of alkalinity. Structural low-pKa acid groups ( $5 < pK_a < 6.4$ ) can be an important source of alkalinity at low temperature for herbaceous feedstock. Wood-derived biochars have higher base cation concentration than herbaceous-derived biochars; but much lower than manures. | (Li et al. 2019; Fidel et al. 2017; Ippolito et al. 2015)    |
|                                   | Temperature   | Temperature increases biochars pH and alkalinity. Structural alkalinity decreases with increasing temperature, while temperature increases the amount of carbonates produced during pyrolysis.                                                                                                                                                                                                                                                                                                                                                                     | (Li et al. 2019; Fidel et al. 2017)                          |
| Conductivity                      | Feedstock     | Higher mineral content in herbaceous biochar was linked to a higher electron exchange capacity                                                                                                                                                                                                                                                                                                                                                                                                                                                                     | (Klöpffel et al. 2014)                                       |
|                                   | Temperature   | Wood charcoal was shown to act as an insulator, a semiconductor and a conductor, respectively at $<300\text{ }^{\circ}\text{C}$ , $300\text{ }^{\circ}\text{C}$ – $800\text{ }^{\circ}\text{C}$ and $>800\text{ }^{\circ}\text{C}$ .                                                                                                                                                                                                                                                                                                                               | (Joseph et al. 2015; Klöpffel et al. 2014)                   |

|                                                                                                                                                        |  |                                                                                                                                                                                                                                |  |
|--------------------------------------------------------------------------------------------------------------------------------------------------------|--|--------------------------------------------------------------------------------------------------------------------------------------------------------------------------------------------------------------------------------|--|
|                                                                                                                                                        |  | Redox activity is controlled by electronic donating phenolic moieties for low temperature biochars, electron accepting quinone moieties for mid-temperature, and quinone and possibly aromatics for high-temperature biochars. |  |
| C <sub>org</sub> : organic carbon (exclude carbon present in biochar's ash as carbonates); CEC: cation exchange capacity; AEC: anion exchange capacity |  |                                                                                                                                                                                                                                |  |



*Table S6: Main controlling factors of the effect of biochar on SOC priming.*

| Controlling factors                                     |             | Observations                                                                                                                                                                                                                             | Ref                                                                                    |
|---------------------------------------------------------|-------------|------------------------------------------------------------------------------------------------------------------------------------------------------------------------------------------------------------------------------------------|----------------------------------------------------------------------------------------|
| Biochar                                                 | Feedstock   | Crop and wood derived biochar significantly induce negative priming.<br>Sludges and manures derived biochars lead to positive priming mostly.<br>Grass biochars lead to both positive and negative priming with null net effect overall. | (Ding et al. 2018)                                                                     |
|                                                         | Temperature | Pyrolysis temperatures above 500°C lead to significant negative priming. Negative priming is much stronger for pyrolysis temperature above 600°C.                                                                                        | (Ding et al. 2018)                                                                     |
|                                                         | Nitrogen    | Increasing C/N ratio of biochar increases negative priming. Biochar with more than 4% nitrogen switch from negative to positive priming, however variations in response are important and not statistically significant.                 | (Ding et al. 2018)                                                                     |
|                                                         | Carbon      | Pyrolysis time, temperature and feedstock control the amount of carbon in biochars. A carbon content over 50% in biochar lead to significant negative priming.                                                                           | (Ding et al. 2018)                                                                     |
|                                                         | Aging       | Charcoal deposits in historical stabilizes recent input of carbon better than adjacent soils without charred materials.                                                                                                                  | (Kerré et al. 2016; Hernandez-Soriano et al. 2016; Kerré, Willaert, and Smolders 2017) |
| Soil                                                    | SOC         | Soils with less than 1% SOC lead to significant positive priming.                                                                                                                                                                        | (Ding et al. 2018)                                                                     |
|                                                         | C/N ratio   | Negative priming is larger at soil C/N below 11-12. Above that value, negative priming is not statistically significant.                                                                                                                 | (Ding et al. 2018)                                                                     |
|                                                         | Texture     | Soil texture seems to have little effect on priming of SOC, being overall negative. Negative priming is more important at clay content above 50%.                                                                                        | (Ding et al. 2018; J. Wang, Xiong, and Kuzyakov 2016)                                  |
|                                                         | pH          | Negative priming is more important at soil pH above 6 and slightly decreases with increasing soil pH.                                                                                                                                    | (Ding et al. 2018)                                                                     |
| SOC: soil organic carbon; C/N: carbon to nitrogen ratio |             |                                                                                                                                                                                                                                          |                                                                                        |

*Table S7: Main controlling factors of the effect of biochar on soil methane (CH<sub>4</sub>) emissions or uptake.*

| Controlling factors |                  | Observations                                                                                                                                                                                                                                                                                                                                                                                                                                                                                                                                | Ref                                                   |
|---------------------|------------------|---------------------------------------------------------------------------------------------------------------------------------------------------------------------------------------------------------------------------------------------------------------------------------------------------------------------------------------------------------------------------------------------------------------------------------------------------------------------------------------------------------------------------------------------|-------------------------------------------------------|
| Biochar             | Feedstock        | Different meta-analysis draw different conclusion regarding the effect of biochar's feedstock on soil methane emissions.                                                                                                                                                                                                                                                                                                                                                                                                                    | (He et al. 2017; Ji et al. 2018; Jeffery et al. 2016) |
|                     | Temperature      | Increasing pyrolysis temperature decreases methane release from 'methane source' soils, but also the oxidative potential of 'methane sink' soils.                                                                                                                                                                                                                                                                                                                                                                                           | (Ji et al. 2018)                                      |
|                     | pH               | Upland soils see reduced methane uptake for biochars with pH below 7 to a positive increase in uptake for biochars with pH >9.                                                                                                                                                                                                                                                                                                                                                                                                              | (Ji et al. 2018; He et al. 2017)                      |
| Soil                | Moisture         | Flooded soils (paddy rice) see their methane emissions reduced after biochar amendment.<br>Upland soils that are 'methane source' see their emissions reduced. Upland soils that are 'methane sink' see their sink capacity reduced.                                                                                                                                                                                                                                                                                                        | (Ji et al. 2018; Jeffery et al. 2016)                 |
|                     | pH               | In upland soils, biochar reduced methane uptake in acidic and neutral soils.<br>In flooded soils, biochar increases methane release in acid soils, but decreases it in neutral and alkaline soils.                                                                                                                                                                                                                                                                                                                                          | (Ji et al. 2018; Jeffery et al. 2016)                 |
|                     | Texture          | Biochar has more pronounced effect on medium textured soils: reducing soil methane emissions from 'methane source' soils and reducing methane sink capacity from 'methane sink' soils.<br>Fine soils see their methane emissions increase after biochar treatment.                                                                                                                                                                                                                                                                          | (Ji et al. 2018)                                      |
| Management          | Fertilization    | Unfertilized soils show higher response to biochar addition regarding decreasing release and uptake of methane.<br>Upon application of organic-N fertilizer, biochar increases the sink capacity 'methane sinks'<br>Both application of organic or synthetic N, decrease emissions of 'methane source' after application of biochar.<br>N-fertilization rate may also influence soil response to biochar application: below 120kgN/ha increasing methane sink/decreasing methane emissions, while more than 120 kgN/ha has opposite effect. | (Jeffery et al. 2016; Ji et al. 2018)                 |
|                     | Application rate | Biochar application rate below 20 t/ha may be beneficial for enhancing soil methane sinks, but increase methane emissions from 'methane source' soils.<br>After that threshold, increasing biochar application rate decreases both methane emissions from source, and decreases sink potential of sinks.                                                                                                                                                                                                                                    | (Ji et al. 2018)                                      |

*Table S8: Main controlling factors on the effect of biochar on soil nitrogen availability.*

| Controlling factors |                  | Observations                                                                                                                                                                                                                                                                                               | Ref                                                                                  |
|---------------------|------------------|------------------------------------------------------------------------------------------------------------------------------------------------------------------------------------------------------------------------------------------------------------------------------------------------------------|--------------------------------------------------------------------------------------|
| Biochar             | Feedstock        | Crop residues are feedstocks that most significantly reduce availability of nitrogen in agroecosystems.                                                                                                                                                                                                    | (Gao, DeLuca, and Cleveland 2019)                                                    |
|                     | Temperature      | Immobilization of both $\text{NO}_3^-$ and $\text{NH}_4^+$ is minimal at medium pyrolysis temperature (400-600°C)                                                                                                                                                                                          | (Gao, DeLuca, and Cleveland 2019; T. T. N. Nguyen et al. 2017)                       |
|                     | AEC and CEC      | $\text{NO}_3^-$ preferentially sorb on AEC sites, while $\text{NH}_4^+$ on CEC sites.                                                                                                                                                                                                                      | (Ippolito et al. 2015)                                                               |
|                     | Aging            | Via decrease in AEC and increase in CEC.                                                                                                                                                                                                                                                                   | (Ippolito et al. 2015)                                                               |
| Soil                | pH               | Soil pH is noted as being an important controlling factor of biochar's effect on soil nitrogen availability by both Gao and colleagues and Nguyen and colleagues, but they disagree.                                                                                                                       | (Gao, DeLuca, and Cleveland 2019; T. T. N. Nguyen et al. 2017)                       |
| Management          | Fertilizer       | Biochar reduces $\text{NH}_4^+$ availability under all N-fertilizer type, but organic-N application. Co-application of fertilizer and biochar may reduces risk of immobilizing nitrate after biochar application. Urea and $\text{NH}_3$ -based fertilizers have potential to mitigate nitrate deficiency. | (Gao, DeLuca, and Cleveland 2019; T. T. N. Nguyen et al. 2017)                       |
|                     | Application rate | Increasing application rate of biochar tend to reduce nitrogen availability.                                                                                                                                                                                                                               | (Gao, DeLuca, and Cleveland 2019; T. T. N. Nguyen et al. 2017; Borchard et al. 2019) |

*Table S9: Main controlling factors of the effect of biochar on soil ammonia (NH<sub>3</sub>) volatilization rate.*

| Controlling factors |                  | Observations                                                                                                                                                                                                                                                                                                                                                                                                             | Ref                                       |
|---------------------|------------------|--------------------------------------------------------------------------------------------------------------------------------------------------------------------------------------------------------------------------------------------------------------------------------------------------------------------------------------------------------------------------------------------------------------------------|-------------------------------------------|
| Biochar             | pH               | Biochars with pH above 9 statistically increase NH <sub>3</sub> volatilization. Biochar pH below 7 tend to increase NH <sub>3</sub> volatilization as well. In between it may or may not decrease NH <sub>3</sub> volatilization.                                                                                                                                                                                        | (Liu et al. 2018)                         |
|                     | Feedstock        | Manure biochars increase NH <sub>3</sub> volatilization, because of their high alkalinity.<br>Biochar from woody biomass reduces NH <sub>3</sub> volatilization more efficiently because of higher sorption capacity.                                                                                                                                                                                                    | (Liu et al. 2018; Sha et al. 2019)        |
|                     | Aging            | Aging of biochar in soils increases its CEC and Biochar liming effect is only temporary. Enhancement of ammonia volatilization after biochar application is expected to be only temporary, in the long term biochar may reduce soil NH <sub>3</sub> volatilization.                                                                                                                                                      | in text beginning p.219 (Liu et al. 2018) |
| Soil                | pH               | Biochar particularly increases NH <sub>3</sub> volatilization in acidic soils with pH below 5-6 and has little effect, even potentially reducing emissions over the rest of the pH range.                                                                                                                                                                                                                                | (Liu et al. 2018; Sha et al. 2019)        |
|                     | Native SOC       | Biochar applied to soils with low native organic carbon (<2%) increase NH <sub>3</sub> volatilization<br>Above 3% SOC, biochar reduction in NH <sub>3</sub> volatilization is statistically significant.                                                                                                                                                                                                                 | (Liu et al. 2018; Sha et al. 2019)        |
|                     | Texture          | The 2 meta-analysis available contradict each other regarding the effect of biochar in fine soil: Sha et al. (2019) find a significant decrease in NH <sub>3</sub> volatilization in finer soils, while Liu et al. (2018) a significant increase. Liu et al.'s explanation of reduced resistance to volatilization due to higher aeration in fine soil after biochar application is a compelling argument in their case. | (Liu et al. 2018; Sha et al. 2019)        |
|                     | CEC              | Soils with low CEC see enhancement volatilization upon biochar application. This enhancement decreases with increase soil CEC.                                                                                                                                                                                                                                                                                           | (Liu et al. 2019)                         |
| Management          | Application rate | Higher application rate tend to increase NH <sub>3</sub> volatilization compared to controls, usually explained by a higher liming effect.                                                                                                                                                                                                                                                                               | (Liu et al. 2018; Sha et al. 2019)        |
|                     | Fertilizer       | Biochar application may be able to handle low N-fertilization (<200kg/ha) as an overall decrease in ammonia volatilization is observed, but higher fertilizer application rate will see higher NH <sub>3</sub> volatilization. Using organic fertilizer or urea do not enhance NH <sub>3</sub> volatilization, but ammonium fertilizer does.                                                                             | (Sha et al. 2019)                         |

Table S10: Main controlling factors on the effect of biochar on soil phosphorus availability.

| Controlling factors |                  | Observations                                                                                                                                                                                                                                                                                                                  | Ref                                                     |
|---------------------|------------------|-------------------------------------------------------------------------------------------------------------------------------------------------------------------------------------------------------------------------------------------------------------------------------------------------------------------------------|---------------------------------------------------------|
| Biochar             | Feedstock        | Biochar derived from crop residues and manures increase the most phosphorus availability.                                                                                                                                                                                                                                     | (Gao, DeLuca, and Cleveland 2019)                       |
|                     | Temperature      | Biochar produced at lower pyrolysis temperatures allows for more available phosphorus. At high temperature stable compounds of phosphorus are produced from the feedstock, limiting its supply to plants. Temperature above 600°C may reduce soil P-availability.                                                             | (Gao, DeLuca, and Cleveland 2019; Glaser and Lehr 2019) |
|                     | Ash              | Ca <sup>2+</sup> and Mg <sup>2+</sup> present in the biochar ashes can lower availability of phosphorus by precipitation.                                                                                                                                                                                                     | (Ippolito et al. 2015)                                  |
| Soil                | Texture          | Medium textured soils have higher responses to biochar application, with an increase in phosphorus availability.                                                                                                                                                                                                              | (Gao, DeLuca, and Cleveland 2019)                       |
|                     | pH               | Soil with pH over 7.5 may experience lower P availability after biochar application, potentially due to liming effect reducing P-availability, or Ca-P precipitation.                                                                                                                                                         | (Gao, DeLuca, and Cleveland 2019; Glaser and Lehr 2019) |
| Management          | Application rate | Increasing application rate was found to increase phosphorus availability, mostly as more biochar brings more phosphorus to the soil. Increased availability is significant at application rate above 10 tonnes biochar per hectare.<br>However, at higher application rate, liming (soil pH increase) may be more important. | (Gao, DeLuca, and Cleveland 2019; Glaser and Lehr 2019) |

*Table S11: Main controlling factors on the effect of biochar on soil nutrient leaching.*

| Controlling factors |                        | Observations                                                                                                                                                                                                                                                                                   | Ref                                             |
|---------------------|------------------------|------------------------------------------------------------------------------------------------------------------------------------------------------------------------------------------------------------------------------------------------------------------------------------------------|-------------------------------------------------|
| Biochar             | Ash                    | Nutrient brought with biochar can readily be leached out of soils.                                                                                                                                                                                                                             | (Ippolito et al. 2015)                          |
| Soil                | Hydraulic conductivity | Increase in soil hydraulic conductivity after biochar application can lead to an increase in the amount of leached nutrients, if they are made more available after biochar application.<br>As such, biochar may reduce nutrient leaching in coarser soil, and may increase it in finer soils. | (Laird and Rogovska 2015)                       |
| Management          | Application rate       | In case of leaching of biochar's nutrient, higher application rate will lead to more leaching.<br>Application rate will also modulate leaching rate as they affect nutrient availability and soil water retention and conductivity.                                                            | (Ippolito et al. 2015; Laird and Rogovska 2015) |

*Table 12: Main controlling factors on the effect of biochar on soil water availability and soil hydraulic conductivity.*

| Controlling factors |                         | Observations                                                                                                                                                                                                                                                                                                                                                                                                                                                                                                                  | Ref                                                           |
|---------------------|-------------------------|-------------------------------------------------------------------------------------------------------------------------------------------------------------------------------------------------------------------------------------------------------------------------------------------------------------------------------------------------------------------------------------------------------------------------------------------------------------------------------------------------------------------------------|---------------------------------------------------------------|
| Biochar             | Hydrophobicity          | Biochar hydrophobicity is an important control on its water uptake potential.                                                                                                                                                                                                                                                                                                                                                                                                                                                 | (Gray et al. 2014; Kinney et al. 2012)                        |
|                     | Porosity                | Biochar's macroporosity is more important for water retention than its microporosity. Choice of feedstock with appropriate macrostructure is important.                                                                                                                                                                                                                                                                                                                                                                       | (Gray et al. 2014; Kinney et al. 2012)                        |
|                     | Particle size and shape | Depending on biochar particle size, biochar can clog or increase the size of soil pores.<br>Clogging happen when biochar particle size is lower than the size of soil interpores. As a consequence, both soil hydraulic conductivity and soil water availability increases.<br>Shape of biochar particles has been suggested to influence soil's interpores structure by disrupting and modifying the interpores size distribution.<br>But very fine biochar particles can loose their porosity, in particular macroporosity. | (Sun and Lu 2014; Trifunovic et al. 2018)                     |
| Soil                | Water repellency        | Biochar's effect on soil water repellency has been little studied. Most of the studies reported no effect of biochar, a few reported conflicting results.                                                                                                                                                                                                                                                                                                                                                                     | (Blanco-Canqui 2017; Hallin et al. 2015)                      |
|                     | Texture                 | Coarse soil see higher increase in soil water availability than finer soil, due to increase in mesopore that allow retention of water after biochar application.<br>Biochar reduces water infiltration and hydraulic conductivity in coarse soil, and the opposite for fine soils. Thus improving soil hydrology in both cases, though the effect is usually more important in coarse soils.<br>Medium textured soils receive less benefit from biochar application.                                                          | (Omondi et al. 2016; Blanco-Canqui 2017)                      |
|                     | Soil pore size          | Soil pore size distribution is important for soil hydrology. Biochar may influence soil pore size distribution via its particles size and shape, and its effect on soil aggregates. Biochar has effect on aggregate stability, which may prevent clogging, and aggregate size, and may increase soil pore size.                                                                                                                                                                                                               | (Sun and Lu 2014; Trifunovic et al. 2018; Blanco-Canqui 2017) |
|                     | Run-off volume          | Biochar reduced run-off volume in 4 out of 6 studies, from 5 to 50% reduction.                                                                                                                                                                                                                                                                                                                                                                                                                                                | (Blanco-Canqui 2018)                                          |
| Management          | Application rate        | Soil available water capacity increases with increasing biochar application rate. But a minimum application rate may be required to observe significant response. Most studies that observed increase in soil available water used application rate >25 t biochar/ha.<br>Soil saturated hydraulic conductivity increases with biochar application rate, but a minimum amount of biochar may be required before significant response (~>20 t biochar/ha).                                                                      | (Omondi et al. 2016; Blanco-Canqui 2017)                      |

----

*Table S13: Classification of the LCA studies under type of feedstock and origin (residues, dedicated plantations or waste) and for which life-cycle stages the results were used in figure 3 in the main text.*

| References                                     | Herbaceous | Wood | Organic waste | Residue | Dedicated plantation | Waste | Supply-chain | Avoided emissions | Carbon sequestration | Effects on soils | Total |
|------------------------------------------------|------------|------|---------------|---------|----------------------|-------|--------------|-------------------|----------------------|------------------|-------|
| (Roberts et al. 2010)                          | x          | x    |               | x       | x                    | x     | x            | x                 | x                    | x                | x     |
| (Hammond et al. 2011)                          | x          | x    |               | x       | x                    |       | x            | x                 | x                    | x                | x     |
| (Ibarrola, Shackley, and Hammond 2012)         | x          | x    | x             | x       |                      | x     | x            | x                 | x                    | x                | x     |
| (Meyer et al. 2012)                            | x          | x    |               | x       |                      |       | x            | x                 | x                    | x                | x     |
| (Field et al. 2013)                            |            | x    |               | x       |                      |       | x            | x                 | x                    | x                | x     |
| (Lugato et al. 2013)                           |            | x    |               | x       |                      |       |              |                   |                      |                  |       |
| (T. L. T. Nguyen, Hermansen, and Nielsen 2013) | x          |      |               | x       |                      |       |              |                   |                      |                  |       |
| (Cao and Pawlowski 2013)                       |            |      | x             |         |                      | x     |              |                   |                      |                  | x     |
| (Sparrevik et al. 2013)                        | x          |      |               | x       |                      |       |              |                   |                      |                  |       |
| (Z. Wang et al. 2014)                          | x          |      |               | x       |                      |       | x            | x                 | x                    | x                | x     |
| (Sparrevik et al. 2014)                        |            | x    |               | x       |                      |       |              |                   |                      |                  |       |
| (Peters, Iribarren, and Dufour 2015)           |            | x    |               |         | x                    |       |              |                   |                      |                  | x     |
| (Homagain et al. 2015)                         |            | x    |               | x       |                      |       |              |                   |                      |                  | x     |
| (Thornley et al. 2015)                         |            | x    |               |         | x                    |       |              |                   |                      |                  | x     |
| (Miller-Robbie et al. 2015)                    |            |      | x             |         |                      | x     |              |                   |                      |                  | x     |



|                                    |          |          |          |          |          |          |          |          |          |          |          |
|------------------------------------|----------|----------|----------|----------|----------|----------|----------|----------|----------|----------|----------|
| (Clare et al. 2015)                | <b>x</b> |          |          | <b>x</b> |          |          |          |          |          |          | <b>x</b> |
| (Mohammadi et al. 2016)            | <b>x</b> |          |          | <b>x</b> |          |          |          |          |          |          |          |
| (Pietro Bartocci et al. 2016)      |          | <b>x</b> |          |          | <b>x</b> |          |          |          |          |          | <b>x</b> |
| (Muñoz et al. 2017)                | <b>x</b> | <b>x</b> |          | <b>x</b> |          |          |          |          |          |          | <b>x</b> |
| (Ericsson et al. 2017)             |          | <b>x</b> |          |          | <b>x</b> |          |          |          |          |          |          |
| (Smebye et al. 2017)               |          | <b>x</b> |          | <b>x</b> |          |          |          |          |          |          |          |
| (Llorach-Massana et al. 2017)      | <b>x</b> |          |          | <b>x</b> |          |          |          |          |          |          | <b>x</b> |
| (Robb and Dargusch 2018)           | <b>x</b> |          |          | <b>x</b> |          |          |          |          |          |          | <b>x</b> |
| (Mohammadi et al. 2019a)           |          |          | <b>x</b> |          |          | <b>x</b> |          |          |          |          | <b>x</b> |
| (Mohammadi et al. 2019b)           |          |          | <b>x</b> |          |          | <b>x</b> |          |          |          |          | <b>x</b> |
| (Rajabi Hamedani et al. 2019)      |          | <b>x</b> | <b>x</b> |          | <b>x</b> | <b>x</b> |          |          |          |          | <b>x</b> |
| (Barry et al. 2019)                |          |          | <b>x</b> |          |          | <b>x</b> |          |          |          |          |          |
| (Azzi, Karlton, and Sundberg 2019) |          | <b>x</b> |          | <b>x</b> |          |          | <b>x</b> | <b>x</b> | <b>x</b> | <b>x</b> | <b>x</b> |
| (Lu and El Hanandeh 2019)          |          | <b>x</b> |          | <b>x</b> |          |          |          |          |          |          | <b>x</b> |
| (Tadele et al. 2019)               | <b>x</b> |          |          |          | <b>x</b> |          | <b>x</b> |          |          |          |          |
| (Thers et al. 2019)                | <b>x</b> |          |          |          | <b>x</b> |          |          |          |          |          |          |
| (Uusitalo and Leino 2019)          | <b>x</b> | <b>x</b> |          | <b>x</b> |          |          |          |          |          |          |          |
| (Xu et al. 2019)                   | <b>x</b> |          |          | <b>x</b> |          |          |          |          |          |          |          |



[illegible]

## References

- Azzi, Elias S., Erik Karlton, and Cecilia Sundberg. 2019. "Prospective Life Cycle Assessment of Large-Scale Biochar Production and Use for Negative Emissions in Stockholm." *Environmental Science & Technology* 53 (14): 8466–76. <https://doi.org/10.1021/acs.est.9b01615>.
- Banik, Chumki, Michael Lawrinenko, Santanu Bakshi, and David A. Laird. 2018. "Impact of Pyrolysis Temperature and Feedstock on Surface Charge and Functional Group Chemistry of Biochars." *Journal of Environment Quality* 47 (3): 452. <https://doi.org/10.2134/jeq2017.11.0432>.
- Barry, Devon, Chiara Barbiero, Cedric Briens, and Franco Berruti. 2019. "Pyrolysis as an Economical and Ecological Treatment Option for Municipal Sewage Sludge." *Biomass and Bioenergy* 122 (March): 472–80. <https://doi.org/10.1016/j.biombioe.2019.01.041>.
- Blanco-Canqui, Humberto. 2017. "Biochar and Soil Physical Properties." *Soil Science Society of America Journal* 81 (4): 687. <https://doi.org/10.2136/sssaj2017.01.0017>.
- . 2018. "Biochar and Water Quality." *Journal of Environment Quality* 48 (1): 2. <https://doi.org/10.2134/jeq2018.06.0248>.
- Borchard, Nils, Michael Schirrmann, Maria Luz Cayuela, Claudia Kammann, Nicole Wrage-Mönnig, Jose M. Estavillo, Teresa Fuertes-Mendizábal, et al. 2019. "Biochar, Soil and Land-Use Interactions That Reduce Nitrate Leaching and N<sub>2</sub>O Emissions: A Meta-Analysis." *Science of The Total Environment* 651 (February): 2354–64. <https://doi.org/10.1016/j.scitotenv.2018.10.060>.
- Cao, Yucheng, and Artur Pawlowski. 2013. "Life Cycle Assessment of Two Emerging Sewage Sludge-to-Energy Systems: Evaluating Energy and Greenhouse Gas Emissions Implications." *Bioresource Technology* 127: 81–91. <https://doi.org/10.1016/j.biortech.2012.09.135>.
- Chen, Zaiming, Xin Xiao, Baoliang Chen, and Lizhong Zhu. 2015. "Quantification of Chemical States, Dissociation Constants and Contents of Oxygen-Containing Groups on the Surface of Biochars Produced at Different Temperatures." *Environmental Science & Technology* 49 (1): 309–17. <https://doi.org/10.1021/es5043468>.
- Clare, Abbie, Simon Shackley, Stephen Joseph, James Hammond, Genxing Pan, and Anthony Bloom. 2015. "Competing Uses for China's Straw: The Economic and Carbon Abatement Potential of Biochar." *GCB Bioenergy* 7 (6): 1272–82. <https://doi.org/10.1111/gcbb.12220>.
- Ding, Fan, Lukas Van Zwieten, Weidong Zhang, Zhe Weng, Shengwei Shi, Jingkuan Wang, and Jun Meng. 2018. "A Meta-Analysis and Critical Evaluation of Influencing Factors on Soil Carbon Priming Following Biochar Amendment." *Journal of Soils and Sediments* 18 (4): 1507–17. <https://doi.org/10.1007/s11368-017-1899-6>.
- Dutta, Tanushree, Eilhann Kwon, Satya Sundar Bhattacharya, Byong Hun Jeon, Akash Deep, Minori Uchimiya, and Ki Hyun Kim. 2017. "Polycyclic Aromatic Hydrocarbons and Volatile Organic Compounds in Biochar and Biochar-Amended Soil: A Review." *GCB Bioenergy* 9 (6): 990–1004. <https://doi.org/10.1111/gcbb.12363>.
- Ericsson, Niclas, Cecilia Sundberg, Åke Nordberg, Serina Ahlgren, and Per-Anders Hansson. 2017. "Time-Dependent Climate Impact and Energy Efficiency of Combined Heat and Power Production from Short-Rotation Coppice Willow Using Pyrolysis or Direct Combustion." *GCB Bioenergy* 9 (5): 876–90. <https://doi.org/10.1111/gcbb.12415>.
- Fidel, Rivka B., David A. Laird, Michael L. Thompson, and Michael Lawrinenko. 2017. "Characterization and Quantification of Biochar Alkalinity." *Chemosphere* 167 (January): 367–73. <https://doi.org/10.1016/j.chemosphere.2016.09.151>.
- Field, John L., Catherine M. H. Keske, Greta L. Birch, Morgan W. DeFoort, and M. Francesca Cotrufo. 2013. "Distributed Biochar and Bioenergy Coproduction: A Regionally Specific Case Study of Environmental Benefits and Economic Impacts." *GCB Bioenergy* 5 (2): 177–91. <https://doi.org/10.1111/gcbb.12032>.
- Gao, Si, Thomas H. DeLuca, and Cory C. Cleveland. 2019. "Biochar Additions Alter Phosphorus and Nitrogen Availability in Agricultural Ecosystems: A Meta-Analysis." *Science of The Total Environment* 654 (March): 463–72. <https://doi.org/10.1016/j.scitotenv.2018.11.124>.

- Ghidotti, Michele, Daniele Fabbri, and Andreas Hornung. 2017. "Profiles of Volatile Organic Compounds in Biochar: Insights into Process Conditions and Quality Assessment." *ACS Sustainable Chemistry & Engineering* 5 (1): 510–17. <https://doi.org/10.1021/acssuschemeng.6b01869>.
- Glaser, B.; Lehr, V.I. Biochar effects on phosphorus availability in agricultural soils: A meta-analysis. *Scientific Reports* 2019, 9, 1–9. doi:10.1038/s41598-019-45693-z.
- Gray, Myles, Mark G. Johnson, Maria I. Dragila, and Markus Kleber. 2014. "Water Uptake in Biochars: The Roles of Porosity and Hydrophobicity." *Biomass and Bioenergy* 61 (February): 196–205. <https://doi.org/10.1016/j.biombioe.2013.12.010>.
- Hale, Sarah E., Johannes Lehmann, David Rutherford, Andrew R. Zimmerman, Robert T. Bachmann, Victor Shitumbanuma, Adam O'Toole, Kristina L. Sundqvist, Hans Peter H. Arp, and Gerard Cornelissen. 2012. "Quantifying the Total and Bioavailable Polycyclic Aromatic Hydrocarbons and Dioxins in Biochars." *Environmental Science & Technology* 46 (5): 2830–38. <https://doi.org/10.1021/es203984k>.
- Hallin, I. L., P. Douglas, S. H. Doerr, and R. Bryant. 2015. "The Effect of Addition of a Wetttable Biochar on Soil Water Repellency." *European Journal of Soil Science* 66 (6): 1063–73. <https://doi.org/10.1111/ejss.12300>.
- Hammond, Jim, Simon Shackley, Saran Sohi, and Peter Brownsort. 2011. "Prospective Life Cycle Carbon Abatement for Pyrolysis Biochar Systems in the UK." *Energy Policy* 39 (5): 2646–2655. <https://doi.org/10.1016/j.enpol.2011.02.033>.
- He, Yanghui, Xuhui Zhou, Liling Jiang, Ming Li, Zhenggang Du, Guiyao Zhou, Junjiong Shao, et al. 2017. "Effects of Biochar Application on Soil Greenhouse Gas Fluxes: A Meta-Analysis." *GCB Bioenergy* 9 (4): 743–755. <https://doi.org/10.1111/gcbb.12376>.
- Hernandez-Soriano, Maria C., Bart Kerré, Peter Goos, Briec Hardy, Joseph Dufey, and Erik Smolders. 2016. "Long-Term Effect of Biochar on the Stabilization of Recent Carbon: Soils with Historical Inputs of Charcoal." *GCB Bioenergy* 8 (2): 371–81. <https://doi.org/10.1111/gcbb.12250>.
- Homagain, Krish, Chander Shahi, Nancy Luckai, and Mahadev Sharma. 2015. "Life Cycle Environmental Impact Assessment of Biochar-Based Bioenergy Production and Utilization in Northwestern Ontario, Canada." *Journal of Forestry Research* 26 (4): 799–809. <https://doi.org/10.1007/s11676-015-0132-y>.
- Ibarrola, Rodrigo, Simon Shackley, and James Hammond. 2012. "Pyrolysis Biochar Systems for Recovering Biodegradable Materials: A Life Cycle Carbon Assessment." *Waste Management* 32 (5): 859–868. <https://doi.org/10.1016/j.wasman.2011.10.005>.
- Ippolito, James A., Kurt A. Spokas, Jeffrey Novak, Rodrick D Lentz, and Keri B Cantrell. 2015. "Biochar Elemental Composition and Factors Influencing Nutrient Retention." In *Biochar for Environmental Management: Science, Technology and Implementation*.
- Jeffery, Simon, Frank G.A. Verheijen, Claudia Kammann, and Diego Abalos. 2016. "Biochar Effects on Methane Emissions from Soils: A Meta-Analysis." *Soil Biology and Biochemistry* 101: 251–258. <https://doi.org/10.1016/j.soilbio.2016.07.021>.
- Ji, Cheng, Yaguo Jin, Chen Li, Jie Chen, Delei Kong, Kai Yu, Shuwei Liu, and Jianwen Zou. 2018. "Variation in Soil Methane Release or Uptake Responses to Biochar Amendment: A Separate Meta-Analysis." *Ecosystems* 21 (8): 1692–1705. <https://doi.org/10.1007/s10021-018-0248-y>.
- Joseph, Stephen, Olivier Husson, Ellen Graber, Lukas van Zwieten, Sara Taherymoosavi, Torsten Thomas, Shaun Nielsen, et al. 2015. "The Electrochemical Properties of Biochars and How They Affect Soil Redox Properties and Processes." *Agronomy* 5 (3): 322–40. <https://doi.org/10.3390/agronomy5030322>.
- Kerré, Bart, C.T. Bravo, J. Leifeld, G. Cornelissen, and E. Smolders. 2016. "Historical Soil Amendment with Charcoal Increases Sequestration of Non-Charcoal Carbon: A Comparison among Methods of Black Carbon Quantification." *European Journal of Soil Science* 67 (3): 324–31. <https://doi.org/10.1111/ejss.12338>.
- Kerré, Bart, Bernd Willaert, and Erik Smolders. 2017. "Lower Residue Decomposition in Historically Charcoal-Enriched Soils Is Related to Increased Adsorption of Organic Matter." *Soil Biology and Biochemistry* 104 (January): 1–7. <https://doi.org/10.1016/j.soilbio.2016.10.007>.
- Kinney, T.J., C.A. Masiello, B. Dugan, W.C. Hockaday, M.R. Dean, K. Zygourakis, and R.T. Barnes. 2012. "Hydrologic Properties of Biochars Produced at Different Temperatures." *Biomass and Bioenergy* 41 (June): 34–43. <https://doi.org/10.1016/j.biombioe.2012.01.033>.

- Klöpffel, Laura, Marco Keiluweit, Markus Kleber, and Michael Sander. 2014. "Redox Properties of Plant Biomass-Derived Black Carbon (Biochar)." *Environmental Science & Technology* 48 (10): 5601–11. <https://doi.org/10.1021/es500906d>.
- Laird, David, and Natalia Rogovska. 2015. "Biocahr Effects on Nutrient Leaching." In *Biochar for Environmental Management: Science, Technology and Implementation*.
- Lawrinenko, Michael, Dapeng Jing, Chumki Banik, and David A. Laird. 2017. "Aluminum and Iron Biomass Pretreatment Impacts on Biochar Anion Exchange Capacity." *Carbon* 118 (July): 422–30. <https://doi.org/10.1016/j.carbon.2017.03.056>.
- Lawrinenko, Michael, and David A. Laird. 2015. "Anion Exchange Capacity of Biochar." *Green Chemistry* 17 (9): 4628–36. <https://doi.org/10.1039/C5GC00828J>.
- Lawrinenko, Michael, David A. Laird, Robert L. Johnson, and Dapeng Jing. 2016. "Accelerated Aging of Biochars: Impact on Anion Exchange Capacity." *Carbon* 103 (July): 217–27. <https://doi.org/10.1016/j.carbon.2016.02.096>.
- Li, Simeng, Scott Harris, Aavudai Anandhi, and Gang Chen. 2019. "Predicting Biochar Properties and Functions Based on Feedstock and Pyrolysis Temperature: A Review and Data Syntheses." *Journal of Cleaner Production* 215 (April): 890–902. <https://doi.org/10.1016/j.jclepro.2019.01.106>.
- Liu, Qi, Benjuan Liu, Yanhui Zhang, Tianlong Hu, Zhibin Lin, Gang Liu, Xiaojie Wang, et al. 2019. "Biochar Application as a Tool to Decrease Soil Nitrogen Losses (NH<sub>3</sub> Volatilization, N<sub>2</sub>O Emissions, and N Leaching) from Croplands: Options and Mitigation Strength in a Global Perspective." *Global Change Biology* 0 (0). <https://doi.org/10.1111/gcb.14613>.
- Liu, Qi, Yanhui Zhang, Benjuan Liu, James E. Amonette, Zhibin Lin, Gang Liu, Per Ambus, and Zubin Xie. 2018. "How Does Biochar Influence Soil N Cycle? A Meta-Analysis." *Plant and Soil* 426 (1–2): 211–25. <https://doi.org/10.1007/s11104-018-3619-4>.
- Llorach-Massana, Pere, Elisa Lopez-Capel, Javier Peña, Joan Rieradevall, Juan Ignacio Montero, and Neus Puy. 2017. "Technical Feasibility and Carbon Footprint of Biochar Co-Production with Tomato Plant Residue." *Waste Management* 67 (September): 121–30. <https://doi.org/10.1016/j.wasman.2017.05.021>.
- Lu, Hangyong Ray, and Ali El Hanandeh. 2019. "Life Cycle Perspective of Bio-Oil and Biochar Production from Hardwood Biomass; What Is the Optimum Mix and What to Do with It?" *Journal of Cleaner Production* 212 (March): 173–89. <https://doi.org/10.1016/j.jclepro.2018.12.025>.
- Lugato, Emanuele, Francesco P. Vaccari, Lorenzo Genesio, Silvia Baronti, Alessandro Pozzi, Mireille Rack, Jeremy Woods, Gianluca Simonetti, Luca Montanarella, and Franco Miglietta. 2013. "An Energy-Biochar Chain Involving Biomass Gasification and Rice Cultivation in Northern Italy." *GCB Bioenergy* 5 (2): 192–201. <https://doi.org/10.1111/gcbb.12028>.
- Mašek, Ondřej, Wolfram Buss, Peter Brownsort, Massimo Rovere, Alberto Tagliaferro, Ling Zhao, Xinde Cao, and Guangwen Xu. 2019. "Potassium Doping Increases Biochar Carbon Sequestration Potential by 45%, Facilitating Decoupling of Carbon Sequestration from Soil Improvement." *Scientific Reports* 9 (1): 5514. <https://doi.org/10.1038/s41598-019-41953-0>.
- Meyer, Sebastian, Ryan M. Bright, Daniel Fischer, Hardy Schulz, and Bruno Glaser. 2012. "Albedo Impact on the Suitability of Biochar Systems to Mitigate Global Warming." *Environmental Science and Technology* 46 (22): 12726–12734. <https://doi.org/10.1021/es302302g>.
- Mia, S., F.A. Dijkstra, and B. Singh. 2017. "Long-Term Aging of Biochar." In *Advances in Agronomy*, 141:1–51. Elsevier. <https://doi.org/10.1016/bs.agron.2016.10.001>.
- Miller-Robbie, Leslie, Bridget A. Ulrich, Dotti F. Ramey, Kathryn S. Spencer, Skuyler P. Herzog, Tzahi Y. Cath, Jennifer R. Stokes, and Christopher P. Higgins. 2015. "Life Cycle Energy and Greenhouse Gas Assessment of the Co-Production of Biosolids and Biochar for Land Application." *Journal of Cleaner Production* 91: 118–127. <https://doi.org/10.1016/j.jclepro.2014.12.050>.
- Mohammadi, Ali, Annette Cowie, Thi Lan Anh Mai, Ruy Anaya de la Rosa, Paul Kristiansen, Miguel Brandão, and Stephen Joseph. 2016. "Biochar Use for Climate-Change Mitigation in Rice Cropping Systems." *Journal of Cleaner Production* 116 (March): 61–70. <https://doi.org/10.1016/j.jclepro.2015.12.083>.
- Mohammadi, Ali, Maria Sandberg, G. Venkatesh, Samieh Eskandari, Tommy Dalgaard, Stephen Joseph, and Karin Granström. 2019a. "Environmental Analysis of Producing Biochar and Energy Recovery from Pulp and Paper Mill Biosludge." *Journal of Industrial Ecology* 0 (0). <https://doi.org/10.1111/jiec.12838>.

- . 2019b. “Environmental Performance of End-of-Life Handling Alternatives for Paper-and-Pulp-Mill Sludge: Using Digestate as a Source of Energy or for Biochar Production.” *Energy* 182 (September): 594–605. <https://doi.org/10.1016/j.energy.2019.06.065>.
- Muñoz, Edmundo, Gustavo Curaqueo, Mara Cea, Leonardo Vera, and Rodrigo Navia. 2017. “Environmental Hotspots in the Life Cycle of a Biochar-Soil System.” *Journal of Cleaner Production* 158: 1–7. <https://doi.org/10.1016/j.jclepro.2017.04.163>.
- Nguyen, Thi Thu Nhan, Cheng-Yuan Xu, Iman Tahmasbian, Rongxiao Che, Zhihong Xu, Xuhui Zhou, Helen M. Wallace, and Shahla Hosseini Bai. 2017. “Effects of Biochar on Soil Available Inorganic Nitrogen: A Review and Meta-Analysis.” *Geoderma* 288 (February): 79–96. <https://doi.org/10.1016/j.geoderma.2016.11.004>.
- Nguyen, Thu Lan T., John E. Hermansen, and Rasmus Glar Nielsen. 2013. “Environmental Assessment of Gasification Technology for Biomass Conversion to Energy in Comparison with Other Alternatives: The Case of Wheat Straw.” *Journal of Cleaner Production* 53 (August): 138–48. <https://doi.org/10.1016/j.jclepro.2013.04.004>.
- Omondi, Morris Oduor, Xin Xia, Alphonse Nahayo, Xiaoyu Liu, Punhoon Khan Korai, and Genxing Pan. 2016. “Quantification of Biochar Effects on Soil Hydrological Properties Using Meta-Analysis of Literature Data.” *Geoderma* 274 (July): 28–34. <https://doi.org/10.1016/j.geoderma.2016.03.029>.
- Peters, Jens F., Diego Iribarren, and Javier Dufour. 2015. “Biomass Pyrolysis for Biochar or Energy Applications? A Life Cycle Assessment.” *Environmental Science & Technology* 49 (8): 5195–5202. <https://doi.org/10.1021/es5060786>.
- Pietro Bartocci, Gianni Bidini, Pierluigi Saputo, and Francesco Fantozzi. 2016. “Biochar Pellet Carbon Footprint.” *Chemical Engineering Transactions* 50 (June): 217–22. <https://doi.org/10.3303/CET1650037>.
- Qiu, Mengyi, Ke Sun, Jie Jin, Lanfang Han, Haoran Sun, Ye Zhao, Xinghui Xia, Fengchang Wu, and Baoshan Xing. 2015. “Metal/Metalloid Elements and Polycyclic Aromatic Hydrocarbon in Various Biochars: The Effect of Feedstock, Temperature, Minerals, and Properties.” *Environmental Pollution* 206 (November): 298–305. <https://doi.org/10.1016/j.envpol.2015.07.026>.
- Rajabi Hamedani, Sara, Tom Kuppens, Robert Malina, Enrico Bocci, Andrea Colantoni, and Mauro Villarini. 2019. “Life Cycle Assessment and Environmental Valuation of Biochar Production: Two Case Studies in Belgium.” *Energies* 12 (11): 2166. <https://doi.org/10.3390/en12112166>.
- Robb, Samuel, and Paul Dargusch. 2018. “A Financial Analysis and Life-Cycle Carbon Emissions Assessment of Oil Palm Waste Biochar Exports from Indonesia for Use in Australian Broad-Acre Agriculture.” *Carbon Management* 9 (2): 105–14. <https://doi.org/10.1080/17583004.2018.1435958>.
- Roberts, Kelli G., Brent A. Gloy, Stephen Joseph, Norman R. Scott, and Johannes Lehmann. 2010. “Life Cycle Assessment of Biochar Systems: Estimating the Energetic, Economic, and Climate Change Potential.” *Environmental Science & Technology* 44: 827–833.
- Sha, Zhipeng, Qianqian Li, Tiantian Lv, Tom Misselbrook, and Xuejun Liu. 2019. “Response of Ammonia Volatilization to Biochar Addition: A Meta-Analysis.” *Science of The Total Environment* 655 (March): 1387–96. <https://doi.org/10.1016/j.scitotenv.2018.11.316>.
- Smebye, Andreas Botnen, Magnus Sparrevik, Hans Peter Schmidt, and Gerard Cornelissen. 2017. “Life-Cycle Assessment of Biochar Production Systems in Tropical Rural Areas: Comparing Flame Curtain Kilns to Other Production Methods.” *Biomass and Bioenergy* 101: 35–43. <https://doi.org/10.1016/j.biombioe.2017.04.001>.
- Sparrevik, Magnus, John L. Field, Vegard Martinsen, Gijs D. Breedveld, and Gerard Cornelissen. 2013. “Life Cycle Assessment to Evaluate the Environmental Impact of Biochar Implementation in Conservation Agriculture in Zambia.” *Environmental Science and Technology* 47 (3): 1206–1215. <https://doi.org/10.1021/es302720k>.
- Sparrevik, Magnus, Henrik Lindhjem, Verania Andria, Annik Magerholm Fet, and Gerard Cornelissen. 2014. “Environmental and Socioeconomic Impacts of Utilizing Waste for Biochar in Rural Areas in Indonesia—a Systems Perspective.” *Environmental Science and Technology* 48 (9): 4664–4671. <https://doi.org/10.1021/es405190q>.
- Sun, Fangfang, and Shenggao Lu. 2014. “Biochars Improve Aggregate Stability, Water Retention, and Pore-Space Properties of Clayey Soil.” *Journal of Plant Nutrition and Soil Science* 177 (1): 26–33. <https://doi.org/10.1002/jpln.201200639>.

- Szymański, Grzegorz S, Zbigniew Karpiński, Stanisław Biniak, and Andrzej Świątkowski. 2002. "The Effect of the Gradual Thermal Decomposition of Surface Oxygen Species on the Chemical and Catalytic Properties of Oxidized Activated Carbon." *Carbon* 40 (14): 2627–39. [https://doi.org/10.1016/S0008-6223\(02\)00188-4](https://doi.org/10.1016/S0008-6223(02)00188-4).
- Tadele, Debela, Poritosh Roy, Fantahun Defersha, Manjusri Misra, and Amar K. Mohanty. 2019. "Life Cycle Assessment of Renewable Filler Material (Biochar) Produced from Perennial Grass (Miscanthus)." *AIMS Energy* 7 (4): 430. <https://doi.org/10.3934/energy.2019.4.430>.
- Thers, Henrik, Sylvestre Njakou Djomo, Lars Elsgaard, and Marie Trydeman Knudsen. 2019. "Biochar Potentially Mitigates Greenhouse Gas Emissions from Cultivation of Oilseed Rape for Biodiesel." *Science of The Total Environment* 671 (June): 180–88. <https://doi.org/10.1016/j.scitotenv.2019.03.257>.
- Thornley, Patricia, Paul Gilbert, Simon Shackley, and Jim Hammond. 2015. "Maximizing the Greenhouse Gas Reductions from Biomass: The Role of Life Cycle Assessment." *Biomass and Bioenergy* 81 (October): 35–43. <https://doi.org/10.1016/j.biombioe.2015.05.002>.
- Trifunovic, Branimir, Howell B. Gonzales, Sujith Ravi, Brenton S. Sharratt, and Sanjay K. Mohanty. 2018. "Dynamic Effects of Biochar Concentration and Particle Size on Hydraulic Properties of Sand." *Land Degradation & Development* 29 (4): 884–93. <https://doi.org/10.1002/ldr.2906>.
- Uusitalo, V., and M. Leino. 2019. "Neutralizing Global Warming Impacts of Crop Production Using Biochar from Side Flows and Buffer Zones: A Case Study of Oat Production in the Boreal Climate Zone." *Journal of Cleaner Production* 227 (August): 48–57. <https://doi.org/10.1016/j.jclepro.2019.04.175>.
- Wang, Jinyang, Zhengqin Xiong, and Yakov Kuzyakov. 2016. "Biochar Stability in Soil: Meta-Analysis of Decomposition and Priming Effects." *GCB Bioenergy* 8 (3): 512–523. <https://doi.org/10.1111/gcbb.12266>.
- Wang, Y.; Villamil, M.B.; Davidson, P.C.; Akdeniz, N. A quantitative understanding of the role of co-composted biochar in plant growth using meta-analysis. *Science of The Total Environment*, 2019, 685, 741–752. doi:10.1016/j.scitotenv.2019.06.244
- Wang, Zhichao, Jennifer B. Dunn, Jeongwoo Han, and Michael Q. Wang. 2014. "Effects of Co-Produced Biochar on Life Cycle Greenhouse Gas Emissions of Pyrolysis-Derived Renewable Fuels." *Biofuels, Bioproducts and Biorefining* 8 (2): 189–204. <https://doi.org/10.1002/bbb.1447>.
- Weber, Kathrin, and Peter Quicker. 2018. "Properties of Biochar." *Fuel* 217 (April): 240–61. <https://doi.org/10.1016/j.fuel.2017.12.054>.
- Wildman, Joe, and Frank Derbyshire. 1991. "Origins and Functions of Macroporosity in Activated Carbons from Coal and Wood Precursors." *Fuel* 70 (5): 655–61. [https://doi.org/10.1016/0016-2361\(91\)90181-9](https://doi.org/10.1016/0016-2361(91)90181-9).
- Xiao, Xin, Zaiming Chen, and Baoliang Chen. 2016. "H/C Atomic Ratio as a Smart Linkage between Pyrolytic Temperatures, Aromatic Clusters and Sorption Properties of Biochars Derived from Diverse Precursory Materials." *Scientific Reports* 6 (March): 22644. <https://doi.org/10.1038/srep22644>.
- Xu, Xiangrui, Kun Cheng, Hua Wu, Jianfei Sun, Qian Yue, and Genxing Pan. 2019. "Greenhouse Gas Mitigation Potential in Crop Production with Biochar Soil Amendment—a Carbon Footprint Assessment for Cross-Site Field Experiments from China." *GCB Bioenergy* 11 (4): 592–605. <https://doi.org/10.1111/gcbb.12561>.
- Yavari, Saba, Amirhossein Malakahmad, and Nasiman B. Sapari. 2015. "Biochar Efficiency in Pesticides Sorption as a Function of Production Variables—a Review." *Environmental Science and Pollution Research* 22 (18): 13824–41. <https://doi.org/10.1007/s11356-015-5114-2>.
